# Supplementary material for: Associations of Social and Psychological Resources with Different Facets of Chronic Stress: A Study with Employed and Unemployed Adolescents
Source: PubMed Central journal article supplement (PMC7400050; doi:10.3390/ijerph17145032), 2020-07-13
Supplement: ijerph-17-05032-s001.pdf [file ijerph-17-05032-s001.pdf]

Supplementary Materials:

**Table S1.** Pearson correlation matrix for continuous variables ( $N = 1405$ ).

|           | 1        | 2        | 3        | 4        | 5        | 6        | 7        | 8        | 9       | 10      | 11    | 12 |
|-----------|----------|----------|----------|----------|----------|----------|----------|----------|---------|---------|-------|----|
| 1. SCR    | 1        |          |          |          |          |          |          |          |         |         |       |    |
| 2. WRY    | 0.87 **  | 1        |          |          |          |          |          |          |         |         |       |    |
| 3. OVRL   | 0.78 **  | 0.62 **  | 1        |          |          |          |          |          |         |         |       |    |
| 4. SOVRL  | 0.66 **  | 0.56 **  | 0.61 **  | 1        |          |          |          |          |         |         |       |    |
| 5. DIS    | 0.66 **  | 0.56 **  | 0.57 **  | 0.53 **  | 1        |          |          |          |         |         |       |    |
| 6. RECO   | 0.70 **  | 0.48 **  | 0.58 **  | 0.55 **  | 0.63 **  | 1        |          |          |         |         |       |    |
| 7. ISO    | 0.69 **  | 0.62 **  | 0.57 **  | 0.51 **  | 0.58 **  | 0.54 **  | 1        |          |         |         |       |    |
| 8. SocS   | -0.49 ** | -0.45 ** | -0.40 ** | -0.36 ** | -0.40 ** | -0.40 ** | -0.61 ** | 1        |         |         |       |    |
| 9. FamS   | -0.38 ** | -0.35 ** | -0.32 ** | -0.33 ** | -0.30 ** | -0.31 ** | -0.35 ** | 0.37 **  | 1       |         |       |    |
| 10. GSE   | -0.28 ** | -0.29 ** | -0.19 ** | -0.08 ** | -0.21 ** | -0.16 ** | -0.25 ** | 0.17 **  | 0.16 ** | 1       |       |    |
| 11. SelfE | -0.54 ** | -0.56 ** | -0.38 ** | -0.32 ** | -0.38 ** | -0.32 ** | -0.46 ** | 0.34 **  | 0.32 ** | 0.38 ** | 1     |    |
| 12. Age   | 0.05     | 0.05 *   | 0.06 *   | 0.08 **  | 0.08 **  | 0.05 *   | 0.06 *   | -0.12 ** | -0.04   | -0.004  | -0.05 | 1  |

SCR = Chronic stress screening scale, WRY = stress due to chronic worrying, OVRL = stress due to work overload, SOVRL = stress due to social overload, DIS = stress due to occupational discontent, RECO = stress due to a lack of social recognition, ISO = stress due to social isolation, WRY = stress due to chronic worrying, SocS = satisfaction with social support, FamS = family support, GSE = self-efficacy, SelfE = self-esteem. \*  $p < 0.05$ , \*\*  $p < 0.001$ .
